# Supplementary material
Source: Springer Nature journal article supplement (https://www.springermedizin.de/resource/supplementary/13223_2012_372_MOESM6_ESM.pdf/9597822)

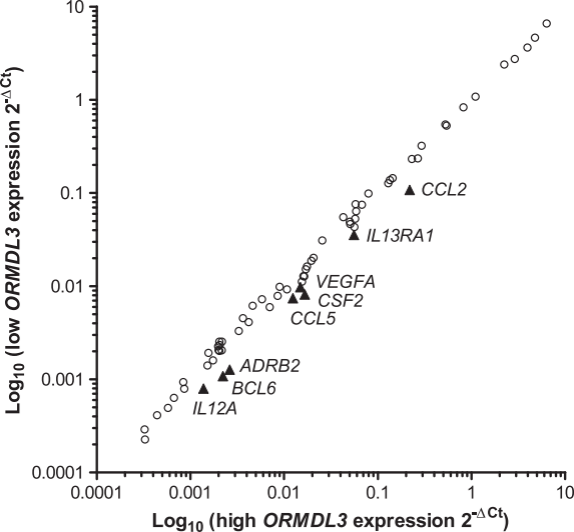

Supplement: MOESM6 [file 9597822]
